# Supplementary material
Source: PubMed Central journal article supplement (PMC8929340)

Supplement figure 1: Deletion of TLR2 and TLR4 did not alter bacterial burden in implant infections with either *S. aureus* or *Acinetobacter* strain M2.

CFUs on implants (A, C, E) and in surrounding femurs (B, D, F) in control groups

without bacteria (A-B), **in the high dose *S. aureus* groups (C-D)**, and in the

*Acinetobacter* strain M2 **overnight incubation groups (E-F)** were compared in TLR2<sup>-</sup>

<sup>-</sup>;TLR4<sup>-</sup> mice and their wild-type control mice. Error bars denote SD. N=5-9

mice/group.

### Supplement Figure 1

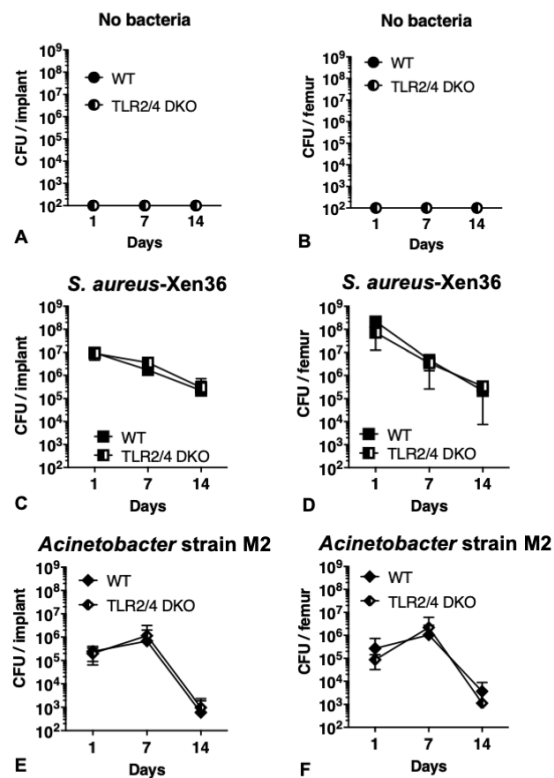

Supplement figure 2: Deletion of TLR2 and TLR4 did not alter levels of inflammatory cytokines induced by *S. aureus* or *Acinetobacter* strain M2.

TNF $\alpha$  (A, E, I), IL1 $\beta$  (B, F, J), IL6 (C, G, K), and CCL2 (D, H, L) in surrounding femurs in control groups without bacteria (A-D), **in the high dose *S. aureus* groups (E-H)**, and in the *Acinetobacter* strain M2 **overnight incubation groups (I-L)** were compared in TLR2<sup>-/-</sup>;TLR4<sup>-/-</sup> mice and their wild-type control mice. Error bars denote SD. N=5-9 mice/group.

Supplement Figure 2

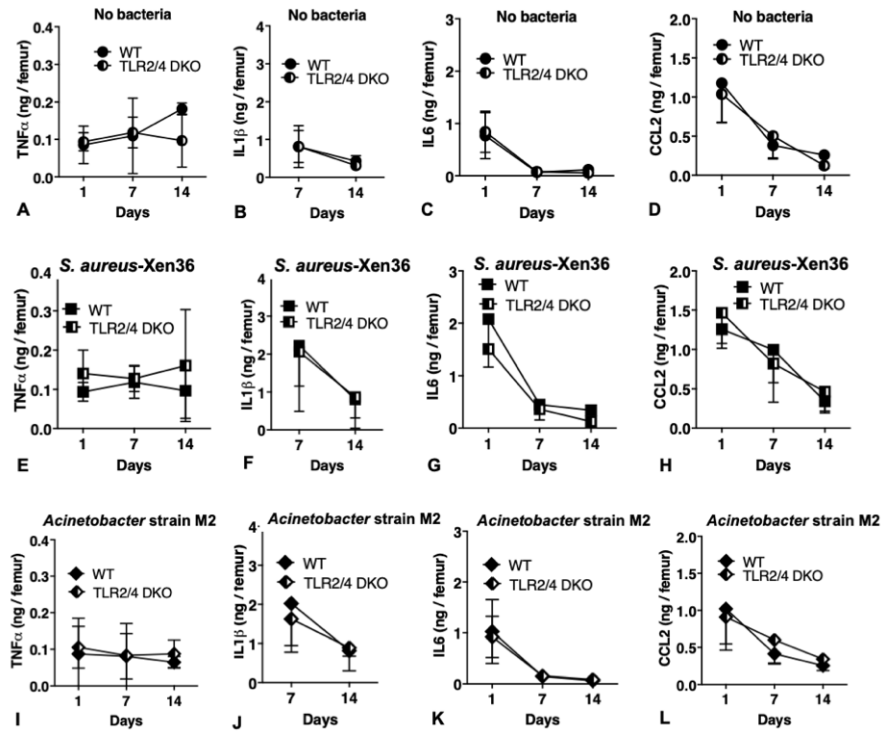

Supplement: iai.00669-21-s0001.pdf [file iai.00669-21-s0001.pdf]
